# Supplementary material
Source: HighWire-hosted journal article supplement (https://jnm.snmjournals.org/highwire/filestream/95491/field_highwire_adjunct_files/0/223420_Supplemental_Data.pdf)
Supplement: 223420_Supplemental_Data.pdf [file 223420_Supplemental_Data.pdf]

## Supplemental Table 1

| Dosimetry in <sup>177</sup> Lu-Pentixather treated patients |                     |                   |                   |                            |                             |                                          |
|-------------------------------------------------------------|---------------------|-------------------|-------------------|----------------------------|-----------------------------|------------------------------------------|
| patient<br>GBq <sup>1</sup>                                 |                     | kidneys           |                   | liver<br>mean <sup>7</sup> | spleen<br>mean <sup>7</sup> | lesion <sup>8</sup><br>maxV <sup>6</sup> |
|                                                             |                     | maxV <sup>6</sup> | mean <sup>7</sup> |                            |                             |                                          |
| <b>#1</b>                                                   |                     |                   |                   |                            |                             |                                          |
| 0.24                                                        | Gy/GBq <sup>2</sup> | 1.39              | 1.02              | 0.38                       | 0.49                        | 3.3                                      |
| 15.2                                                        | Gy/GBq <sup>3</sup> | 0.69              | 0.57              | 0.37                       | 0.47                        | 3.5                                      |
|                                                             | Ratio               | 50%               | 55%               | 97%                        | 96%                         | 106%                                     |
|                                                             | Gy <sup>4</sup>     | 10.5              | 8.7               | 5.6                        | 7.1                         | 53                                       |
| <b>#2</b>                                                   |                     |                   |                   |                            |                             |                                          |
| 0.2                                                         | Gy/GBq <sup>2</sup> | 1.08              | 0.93              | 0.79                       | 1.74                        | 9.5                                      |
| 23.5                                                        | Gy/GBq <sup>3</sup> | 0.53              | 0.5               | 0.56                       | 1.4                         | 3                                        |
|                                                             | Ratio               | 49%               | 54%               | 71%                        | 80%                         | 32%                                      |
|                                                             | Gy <sup>4</sup>     | 12.5              | 11.8              | 13.2                       | 32.9                        | 70                                       |
| <b>#3</b>                                                   |                     |                   |                   |                            |                             |                                          |
| 0.2                                                         | Gy/GBq <sup>2</sup> | 2.53              | 2.28              | 0.95                       | 1                           | 4.6                                      |
| 7.8                                                         | Gy/GBq <sup>3</sup> | 1.53              | 1.57              | 0.75                       | 0.81                        | 4.8                                      |
|                                                             | Ratio               | 60%               | 69%               | 79%                        | 81%                         | 104%                                     |
|                                                             | Gy <sup>4</sup>     | 11.9              | 12.2              | 5.9                        | 6.3                         | 37                                       |
| <b>#4</b>                                                   |                     |                   |                   |                            |                             |                                          |
| 0.21                                                        | Gy/GBq <sup>2</sup> | 2.25              | 1.5               | 0.85                       | 0.8                         |                                          |
| 9.9                                                         | Gy/GBq <sup>3</sup> | 1.62              | 1.1               | 0.63                       | 0.73                        |                                          |
|                                                             | Ratio               | 72%               | 73%               | 74%                        | 91%                         |                                          |
|                                                             | Gy <sup>4</sup>     | 16                | 10.9              | 6.2                        | 7.2                         |                                          |
| <b>#5</b>                                                   |                     |                   |                   |                            |                             |                                          |
| 0.21                                                        | Gy/GBq <sup>2</sup> | 1.36              | 1                 | 0.39                       | 1.03                        | 5.1                                      |
| 14.6                                                        | Gy/GBq <sup>3</sup> | 0.96              | 0.78              | 0.43                       | 0.83                        | 4.5                                      |
|                                                             | Ratio               | 71%               | 78%               | 110%                       | 81%                         | 88%                                      |
|                                                             | Gy <sup>4</sup>     | 14                | 11.4              | 6.3                        | 12.1                        | 66                                       |
| <b>#6</b>                                                   |                     |                   |                   |                            |                             |                                          |
| 0.2                                                         | Gy/GBq <sup>2</sup> | 2.21              | 1.36              | 0.54                       | 0.69                        | 0.7                                      |
| 7.6                                                         | Gy/GBq <sup>3</sup> | 1.76              | 1.03              | 0.45                       | 0.68                        | 0.57                                     |
|                                                             | Ratio               | 80%               | 76%               | 83%                        | 99%                         | 81%                                      |
|                                                             | Gy <sup>4</sup>     | 13.4              | 7.8               | 3.4                        | 5.2                         | 4.3                                      |
| mean Ratio <sup>5</sup> (%)                                 |                     | 64 ± 13           | 68 ± 10           | 86 ± 15                    | 88 ± 8 %                    | 82 ± 30                                  |

1) Patient number and <sup>177</sup>Lu-Pentixather activities for diagnostics and treatment

2) Specific absorbed dose in pre-therapeutic dosimetry

3) Specific absorbed dose from therapy

4) Therapeutic absorbed dose

5) Mean ratio of specific absorbed doses in diagnostics and treatment

6) Absorbed dose in the contiguous 1 ml volume with the highest activity concentration

7) Absorbed dose in entire organ or large representative volume

8) Most dominant malignant lesion

## Supplemental Table 2

Characteristics of the different administered radiopharmaceuticals

| radionuclide 1        | radionuclide 2                | application interval | activity radionuclide 1 | activity radionuclide 2 |
|-----------------------|-------------------------------|----------------------|-------------------------|-------------------------|
| <sup>90</sup> Y-CPCR4 | <sup>153</sup> Samarium-EDTMP | 5 days               | 4.7 GBq                 | 15.9 GBq                |
| <sup>90</sup> Y-CPCR4 | <sup>188</sup> Re-CD66        | 5 days               | 2.7 GBq                 | 7.7 GBq                 |
| <sup>90</sup> Y-CPCR4 | <sup>90</sup> Y-Zevalin       | 1 day                | 5.8 GBq                 | 0.9 GBq                 |
| <sup>90</sup> Y-CPCR4 | <sup>188</sup> Re-CD66        | 6 days               | 4.5 GBq                 | 5.2 GBq                 |
| <sup>90</sup> Y-CPCR4 | <sup>188</sup> Re-CD66        | 2 days               | 5.8 GBq                 | 5.6 GBq                 |
| <sup>90</sup> Y-CPCR4 | <sup>188</sup> Re-CD66        | 5 days               | 5.6 GBq                 | 9.9 GBq                 |
| <sup>90</sup> Y-CPCR4 | <sup>188</sup> Re-CD66        | 3 days               | 2.4 GBq                 | 8.6 GBq                 |
| <sup>90</sup> Y-CPCR4 | <sup>188</sup> Re-CD66        | 5 days               | 7.4 GBq                 | 12.7 GBq                |

### Supplemental Table 3

Higher grade toxicities respective of the administered radiopharmaceuticals

|                      | <sup>177</sup> Lu-CPCR4 | <sup>90</sup> Y-CPCR4 | <sup>90</sup> Y-CPCR4 +<br><sup>188</sup> Re-CD66 | <sup>90</sup> Y-CPCR4 +<br><sup>153</sup> Samarium-<br>EDTMP | <sup>90</sup> Y-CPCR4 +<br><sup>90</sup> Y-Zevalin |
|----------------------|-------------------------|-----------------------|---------------------------------------------------|--------------------------------------------------------------|----------------------------------------------------|
|                      | 6 patients              | 11 patients           | 6 patients                                        | 1 patient                                                    | 1 patient                                          |
| Events, no. (%)      |                         |                       |                                                   |                                                              |                                                    |
| Anemia               |                         |                       |                                                   |                                                              |                                                    |
| Grade ≥ 3            | 3 (50)                  | 8 (80)                | 5 (83)                                            | 1 (100)                                                      | 0 (0)                                              |
| Thrombopenia         |                         |                       |                                                   |                                                              |                                                    |
| Grade ≥ 3            | 6 (100)                 | 7 (64)                | 6 (100)                                           | 1 (100)                                                      | 1 (100)                                            |
| Neutropenie          |                         |                       |                                                   |                                                              |                                                    |
| Grade ≥ 3            | 5 (83)                  | 8 (80)                | 5 (83)                                            | 1 (100)                                                      | 1 (100)                                            |
| Acute kidney failure |                         |                       |                                                   |                                                              |                                                    |
| Grade ≥ 3            | 0 (0)                   | 1 (9)                 | 0 (0)                                             | 0 (0)                                                        | 0 (0)                                              |
| Proteinuria          |                         |                       |                                                   |                                                              |                                                    |
| Grade ≥ 3            | 0 (0)                   | 1 (9)                 | 0 (0)                                             | 0 (0)                                                        | 0 (0)                                              |
| Hypocalcemia         |                         |                       |                                                   |                                                              |                                                    |
| Grade ≥ 3            | 2 (33)                  | 2 (18)                | 0 (0)                                             | 0 (0)                                                        | 0 (0)                                              |
| oral Mucositis       |                         |                       |                                                   |                                                              |                                                    |
| Grade ≥ 3            | 1 (17)                  | 0 (0)                 | 0 (0)                                             | 0 (0)                                                        | 0 (0)                                              |
| Arrythmia            |                         |                       |                                                   |                                                              |                                                    |
| Grade ≥ 3            | 1 (17)                  | 0 (0)                 | 0 (0)                                             | 0 (0)                                                        | 0 (0)                                              |
| Hypertension         |                         |                       |                                                   |                                                              |                                                    |
| Grade ≥ 3            | 1 (17)                  | 1 (9)                 | 0 (0)                                             | 0 (0)                                                        | 0 (0)                                              |
| Hypotension          |                         |                       |                                                   |                                                              |                                                    |
| Grade ≥ 3            | 0 (0)                   | 0 (0)                 | 1 (17)                                            | 0 (0)                                                        | 0 (0)                                              |
| Peripheral edema     |                         |                       |                                                   |                                                              |                                                    |
| Grade ≥ 3            | 0 (0)                   | 0 (0)                 | 2 (33)                                            | 0 (0)                                                        | 0 (0)                                              |
| Sensory              |                         |                       |                                                   |                                                              |                                                    |
| Grade ≥ 3            | 0 (0)                   | 1 (9)                 | 0 (0)                                             | 0 (0)                                                        | 0 (0)                                              |
| Decrease of appetite |                         |                       |                                                   |                                                              |                                                    |
| Grade ≥ 3            | 1 (17)                  | 1 (9)                 | 0 (0)                                             | 0 (0)                                                        | 0 (0)                                              |
| Bleeding             |                         |                       |                                                   |                                                              |                                                    |
| Grade ≥ 3            | 0 (0)                   | 1 (9)                 | 0 (0)                                             | 0 (0)                                                        | 0 (0)                                              |
| Infections           |                         |                       |                                                   |                                                              |                                                    |
| Grade ≥ 3            | 0 (0)                   | 7 (63)                | 2 (33)                                            | 0 (0)                                                        | 0 (0)                                              |
| Sweats               |                         |                       |                                                   |                                                              |                                                    |
| Grade ≥ 3            | 0 (0)                   | 0 (0)                 | 1 (17)                                            | 0 (0)                                                        | 0 (0)                                              |

Supplemental Table 4

---

| Events                                      | no. (%) |
|---------------------------------------------|---------|
| Renal and hepatobiliary toxicities          |         |
| Acute kidney failure                        |         |
| any grade                                   | 2 (8)   |
| grade $\geq$ 3                              | 1 (4)   |
| Proteinuria                                 |         |
| any grade                                   | 8 (32)  |
| grade $\geq$ 3                              | 1 (4)   |
| Hematuria                                   |         |
| any grade                                   | 7 (27)  |
| grade $\geq$ 3                              | 0 (0)   |
| Hyperbilirubinemia                          |         |
| any grade                                   | 6 (24)  |
| grade $\geq$ 3                              | 0 (0)   |
| Elevation of liver enzymes [ASAT, ALAT, AP] |         |
| any grade                                   | 15 (60) |
| grade $\geq$ 3                              | 0 (0)   |

---

## Supplemental Table 5

| Infectious side effects |         |
|-------------------------|---------|
| Adverse events          | no. (%) |
| Fever                   |         |
| any grade               | 13 (52) |
| grade $\geq$ 3          | 0 (0)   |
| Infections              |         |
| any grade               | 14 (56) |
| grade $\geq$ 3          | 9 (36)  |
| Chills                  |         |
| any grade               | 1 (4)   |
| grade $\geq$ 3          | 0 (0)   |
| Sweats                  |         |
| any grade               | 3 (12)  |
| grade $\geq$ 3          | 1 (4)   |
| Myalgia / Arthralgia    |         |
| any grade               | 0 (0)   |
| grade $\geq$ 3          | 0 (0)   |

Supplemental Table 6

---

| Electrolyte disorders |         |
|-----------------------|---------|
| Events                | no. (%) |
| Hypoglycemia          |         |
| any grade             | 1 (4)   |
| grade $\geq$ 3        | 0 (0)   |
| Hyperglycemia         |         |
| any grade             | 22 (88) |
| grade $\geq$ 3        | 0 (0)   |
| Hypocalcemia          |         |
| any grade             | 19 (76) |
| grade $\geq$ 3        | 4 (16)  |
| Hypercalcemia         |         |
| any grade             | 1 (4)   |
| grade $\geq$ 3        | 0 (0)   |
| Hypokalemia           |         |
| any grade             | 13 (52) |
| grade $\geq$ 3        | 0 (0)   |
| Hyperkalemia          |         |
| any grade             | 7 (28)  |
| grade $\geq$ 3        | 0 (0)   |
| Hypomagnesemia        |         |
| any grade             | 10 (40) |
| grade $\geq$ 3        | 0 (0)   |
| Hyponatremia          |         |
| any grade             | 12 (48) |
| grade $\geq$ 3        | 0 (0)   |

---

Supplemental Table 7

---

| Gastrointestinal toxicities |         |
|-----------------------------|---------|
| Events                      | no. (%) |
| Nausea                      |         |
| any grade                   | 4 (16)  |
| grade $\geq$ 3              | 0 (0)   |
| Vomiting                    |         |
| any grade                   | 1 (4)   |
| grade $\geq$ 3              | 0 (0)   |
| Diarrhea                    |         |
| any grade                   | 4 (16)  |
| grade $\geq$ 3              | 0 (0)   |
| Constipation                |         |
| any grade                   | 3 (12)  |
| grade $\geq$ 3              | 0 (0)   |
| Oral mucositis              |         |
| any grade                   | 10 (40) |
| grade $\geq$ 3              | 1 (4)   |
| Xerostomia                  |         |
| any grade                   | 2 (8)   |
| grade $\geq$ 3              | 0 (0)   |

---

Supplemental Table 8

---

| Cardiovascular toxicities |         |
|---------------------------|---------|
| Adverse events            | no. (%) |
| Arrhythmia                |         |
| any grade                 | 3 (12)  |
| grade $\geq$ 3            | 1 (4)   |
| Pericardial effusion      |         |
| any grade                 | 5 (20)  |
| grade $\geq$ 3            | 0 (0)   |
| Hypertension              |         |
| any grade                 | 17 (68) |
| grade $\geq$ 3            | 2 (8)   |
| Hypotension               |         |
| any grade                 | 8 (32)  |
| grade $\geq$ 3            | 1 (4)   |
| Thrombosis                |         |
| any grade                 | 2 (8)   |
| grade $\geq$ 3            | 0 (0)   |
| Peripheral edema          |         |
| any grade                 | 5 (20)  |
| grade $\geq$ 3            | 2 (8)   |

---



## Supplemental Table 8

| Infectious side effects |         |
|-------------------------|---------|
| Adverse events          | no. (%) |
| Fever                   |         |
| any grade               | 13 (52) |
| grade $\geq$ 3          | 0 (0)   |
| Infections              |         |
| any grade               | 14 (56) |
| grade $\geq$ 3          | 9 (36)  |
| Chills                  |         |
| any grade               | 1 (4)   |
| grade $\geq$ 3          | 0 (0)   |
| Sweats                  |         |
| any grade               | 3 (12)  |
| grade $\geq$ 3          | 1 (4)   |
| Myalgia / Arthralgia    |         |
| any grade               | 0 (0)   |
| grade $\geq$ 3          | 0 (0)   |

Supplemental Table 9

---

| Toxicities of the nervous system |         |
|----------------------------------|---------|
| Adverse events                   | no. (%) |
| Sensory                          |         |
| any grade                        | 2 (8)   |
| grade $\geq$ 3                   | 1 (4)   |
| Motory                           |         |
| any grade                        | 6 (24)  |
| grade $\geq$ 3                   | 0 (0)   |
| Consciousness                    |         |
| any grade                        | 3 (12)  |
| grade $\geq$ 3                   | 0 (0)   |
| Headache                         |         |
| any grade                        | 3 (12)  |
| grade $\geq$ 3                   | 0 (0)   |
| Vertigo                          |         |
| any grade                        | 3 (12)  |
| grade $\geq$ 3                   | 0 (0)   |
| Insomnia                         |         |
| any grade                        | 7 (28)  |
| grade $\geq$ 3                   | 0 (0)   |

---

Supplemental Table 10

---

| General disorders    |         |
|----------------------|---------|
| Adverse events       | no. (%) |
| Allergic reaction    |         |
| any grade            | 1 (4)   |
| grade $\geq$ 3       | 0 (0)   |
| Decrease of appetite |         |
| any grade            | 3 (12)  |
| grade $\geq$ 3       | 2 (8)   |
| Weight loss          |         |
| any grade            | 3 (12)  |
| grade $\geq$ 3       | 0 (0)   |
| Weight gain          |         |
| any grade            | 3 (12)  |
| grade $\geq$ 3       | 0 (0)   |
| Bleeding             |         |
| any grade            | 7 (28)  |
| grade $\geq$ 3       | 1 (4)   |

---
